# Supplementary material for: Eco-friendly, catalyst-free synthesis of highly pure carbon spheres using vegetable oils as a renewable source and their application as a template for ZnO and MgO hollow spheres
Source: Royal Society of Chemistry journal article supplement (doi:10.1039/c5ra06742a), 2015-01-01
Supplement: c5ra06742a1.pdf [file c5ra06742a1.pdf]

## Supplementary information

### **Eco-friendly, catalyst-free synthesis of highly pure carbon spheres using vegetable oils as renewable source and their application as a template for ZnO and MgO hollow spheres**

Sandesh Y. Sawant<sup>a,b</sup>, S. Senthilkumar<sup>a</sup>, Rajesh S. Somani<sup>a\*</sup>, Moo Hwan Cho<sup>b\*</sup> and Hari C.

Bajaj<sup>a\*</sup>

<sup>a</sup>Discipline of Inorganic Materials and Catalysis,

Central Salt & Marine Chemicals Research Institute,

Council of Scientific & Industrial Research (CSIR),

G. B. Marg, Bhavnagar 364002, Gujarat, India.

<sup>b</sup>School of Chemical Engineering, Yeungnam University,

Gyeongsan-si, Gyeongbuk 712-749, South Korea.

---

\* Corresponding author: Tel: +91 278 2471793; Fax: +91 278 2567562; E-mail:

[rssomani@csmcri.org](mailto:rssomani@csmcri.org) (Rajesh S. Somani); [hcbajaj@csmcri.org](mailto:hcbajaj@csmcri.org) (Hari C. Bajaj); Tel: +82-53-

810-2517; Fax: +82-53-810-4631; E-mail: [mhcho@ynu.ac.kr](mailto:mhcho@ynu.ac.kr) (Moo Hwan Cho)

The present address of Sandesh Y. Sawant is School of Chemical Engineering, Yeungnam

University, Gyeongsan-si, Gyeongbuk 712-749, South Korea

## ***1. Characterization of vegetable oils***

### ***1.1 Estimation of acid value and % free fatty acids***

2.0 g of oil was titrated against 0.1 N ethanolic KOH in 20 ml of ethanol: diethyl ether (1:1) mixture as solvent using phenolphthalein as indicator. Percentage free fatty acids (FFAs) were calculated using oleic acid as a factor.

### ***1.2 Saponification value***

2.0 g of oil was heated at 60 °C for 30 minutes in 25 ml of 0.5 N ethanolic KOH and titrated against 0.5 N hydrochloric acid using phenolphthalein indicator.

### ***1.3 Fatty acid compositions***

Fatty acid composition of vegetable oil was determined by Gas chromatography equipped with mass spectroscopy (GC-MS) (GCMS-QP 2010, Shimadzu) using helium as carrier gas with flame ionization detector and RTX-5 capillary column. 1 g of oil was converted to methyl ester using 0.1 g of NaOH in 15 ml of methanol at 50 °C for 5 h; and extracted with n-hexane before being injected into the GC.

**Table S1**

Chemical characteristics of the vegetable oils used for synthesis of the carbon spheres

| Parameter                          | Jatropha<br>oil | Groundnut<br>oil | Coconut<br>oil | Mustard<br>oil | Cotton<br>seed oil | Cotton<br>seed oil<br>(used) |
|------------------------------------|-----------------|------------------|----------------|----------------|--------------------|------------------------------|
| Free fatty acid (mg/g)             | 6.27            | 0.63             | 0.34           | 0.51           | 0.08               | 0.33                         |
| Acid value (mg KOH/g)              | 12.54           | 1.27             | 0.68           | 1.02           | 0.16               | 0.66                         |
| Saponification value<br>(mg KOH/g) | 160             | 185              | 216            | 165            | 195                | 182                          |

**Table S2**

Fatty acid compositions of the vegetable oils under study determined by GC-MS analysis

| Fatty acid (x:y)   | Jatropha<br>oil | Groundnut<br>oil | Coconut<br>oil | Mustard<br>oil | Cotton<br>seed oil | Cotton seed<br>oil (used) |
|--------------------|-----------------|------------------|----------------|----------------|--------------------|---------------------------|
| Palmitic (16:0)    | 17.84           | 11.09            | 10.40          | ---            | 28.82              | 28.13                     |
| Stearic (18:0)     | 8.63            | 5.87             | 3.44           | 2.33           | 3.91               | 3.66                      |
| Arachidic (20:0)   | 0.42            | 2.09             | ---            | ---            | 0.44               | 0.47                      |
| Oleic (18:1)       | 32.19           | 73.84            | 7.88           | 16.92          | 18.35              | 16.99                     |
| Linoleic (18:2)    | 40.21           | ---              | 1.61           | 14.93          | 46.32              | 48.76                     |
| Gondoic (20:0)     | ---             | 1.38             | ---            | 4.94           | ---                | ---                       |
| Behenic (22:0)     | ---             | 3.75             | ---            | 2.45           | 0.22               | 0.28                      |
| Lignoceric (24:0)  | ---             | 1.98             | ---            | ---            | ---                | 0.14                      |
| Caproic (6:0)      | ---             | ---              | 0.45           | ---            | ---                | ---                       |
| Caprylic (8:0)     | ---             | ---              | 8.98           | ---            | ---                | ---                       |
| Capric (10:0)      | ---             | ---              | 5.38           | ---            | ---                | ---                       |
| Lauric (12:0)      | ---             | ---              | 41.95          | ---            | ---                | ---                       |
| Myristic (14:0)    | ---             | ---              | 19.91          | 2.52           | 1.11               | 0.98                      |
| Erucic (22:1)      | ---             | ---              | ---            | 53.86          | ---                | ---                       |
| Palmitoleic (16:1) | 0.71            | ---              | ---            | ---            | 0.83               | 0.59                      |
| Nervonic (24:1)    | ---             | ---              | ---            | 2.05           | ---                | ---                       |

x: total number of carbon atoms: y: number of unsaturations

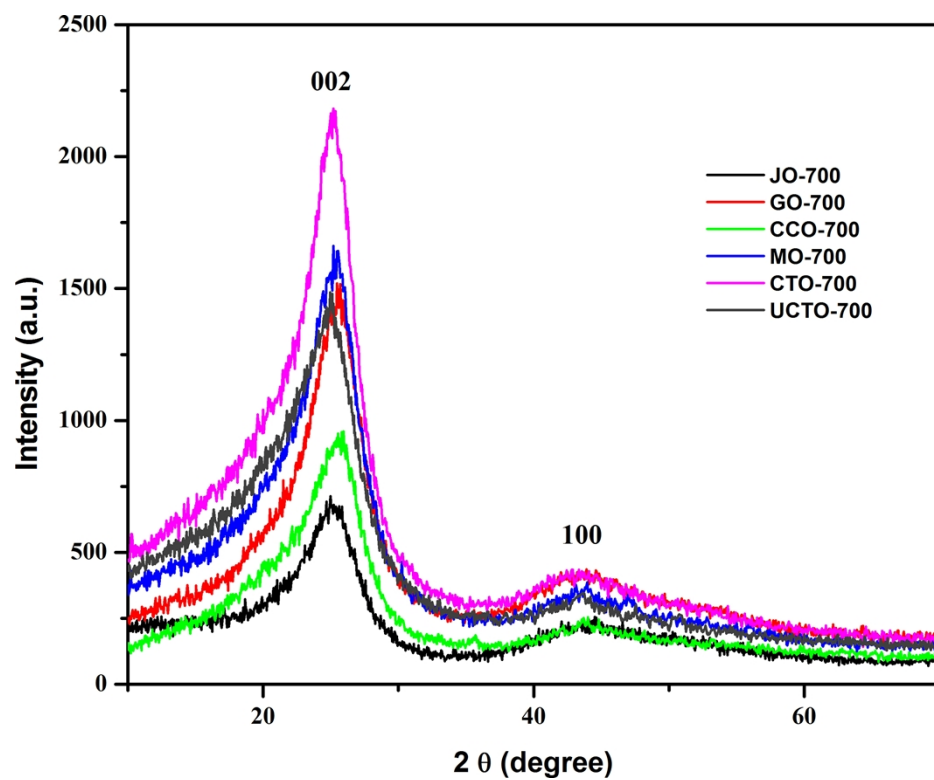

**Fig. S1** X-ray diffraction pattern of the carbon spheres prepared using different vegetable oils at 700 °C for zero minute under autogenic pressure.

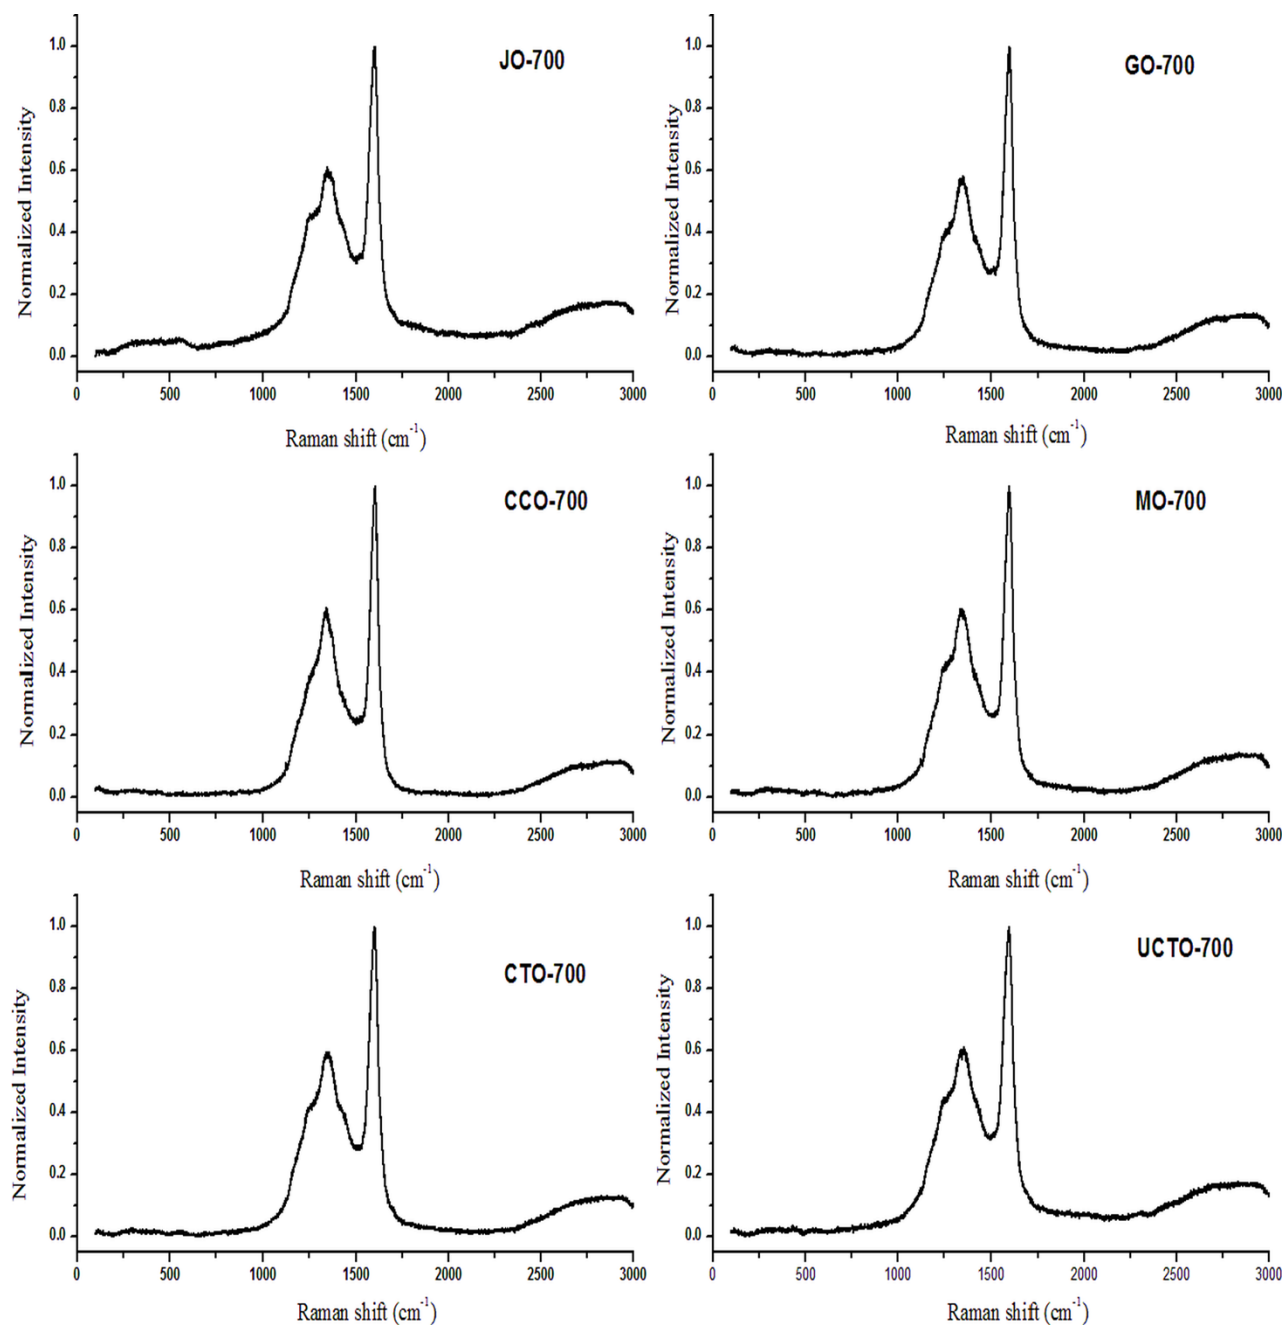

**Fig. S2** FT-Raman spectrum of the carbon spheres prepared using different vegetable oils under optimized conditions.

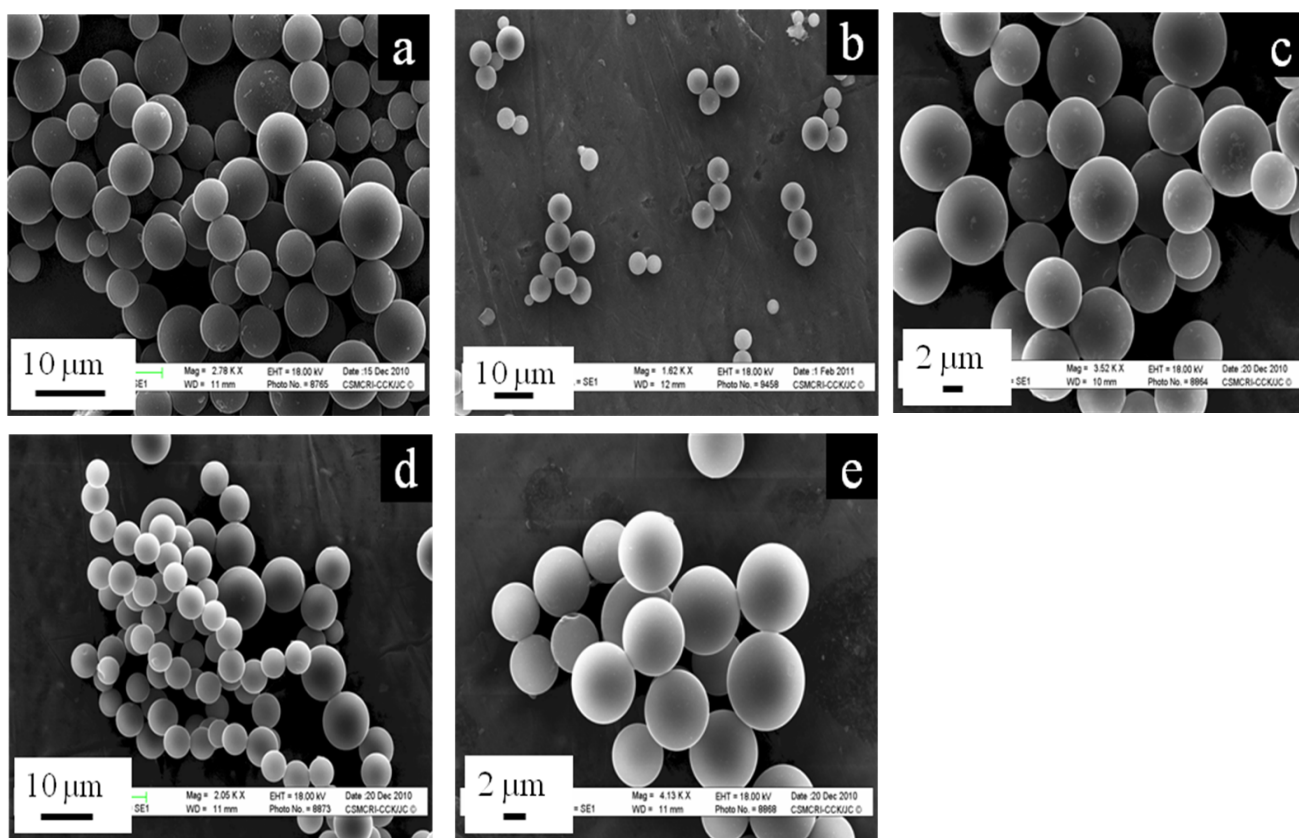

**Fig. S3** SEM images of (a) GO-700, (b) CCO-700, (c) MO-700, (d) CTO-700 and (e) UCTO-700.

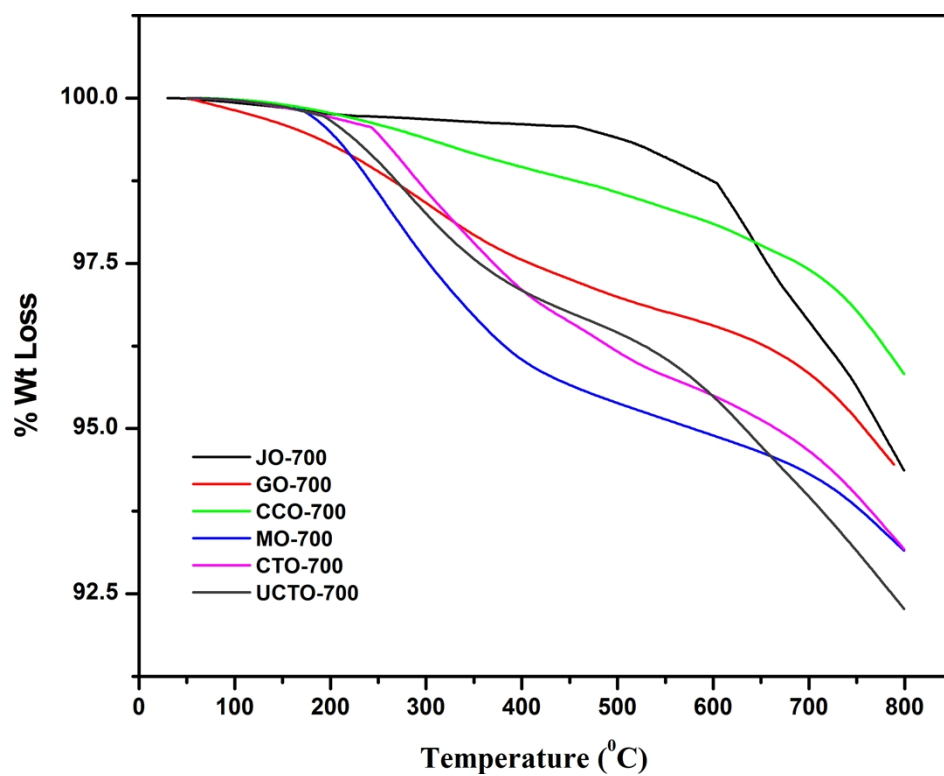

**Fig. S4** TGA plot of the carbon spheres prepared using different vegetable oils.



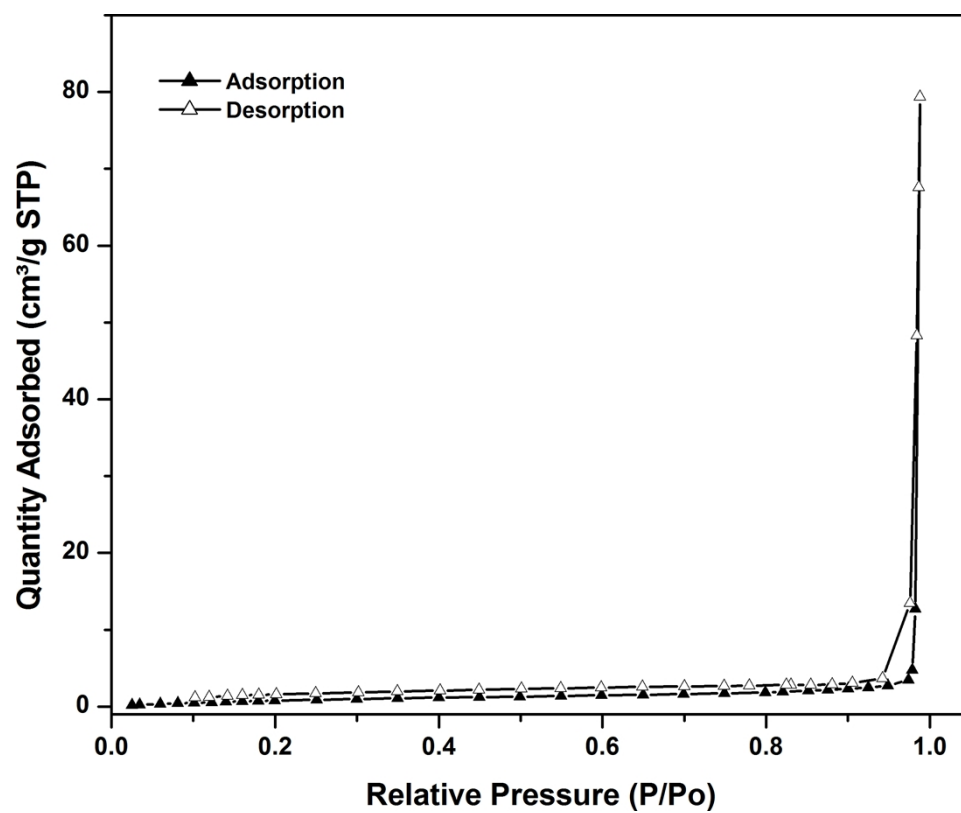

**Fig. S5** N<sub>2</sub> Sorption isotherm of the carbon spheres prepared from jatropha oil as carbon source (JO-700) at 77 K.

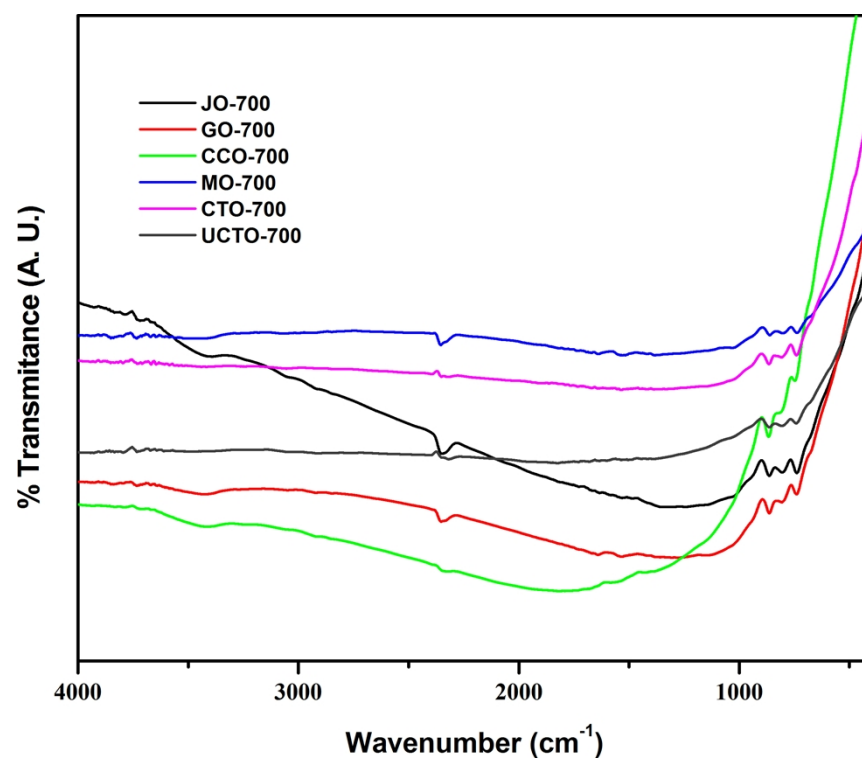

**Fig. S6** FT-IR spectra of the carbon spheres prepared using different vegetable oils.

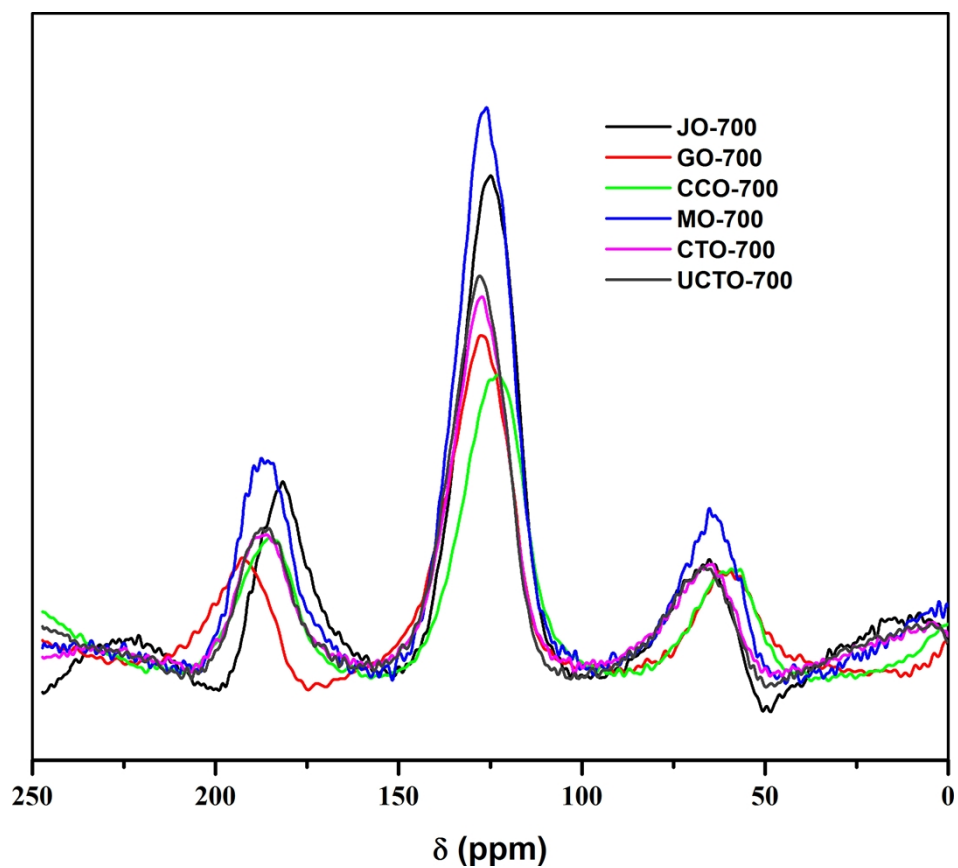

**Fig. S7**  $^{13}\text{C}$  CP-MAS NMR spectra of the carbon spheres prepared using different vegetable oils at 700 °C.

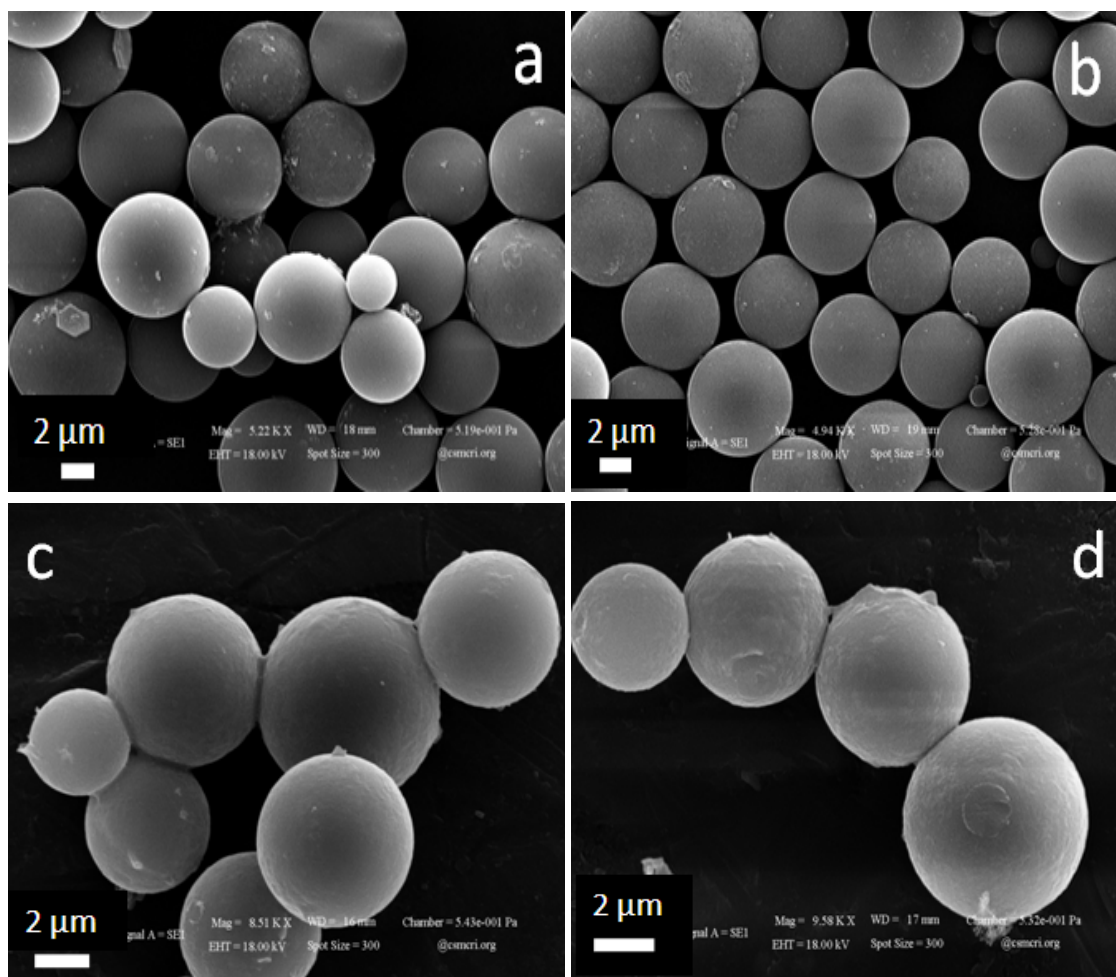

**Fig. S8** SEM images of carbon spheres uniformly coated with zinc hydroxide and magnesium hydroxide prepared by (a) 0.05g  $\text{ZnCl}_2$  (b) 0.1g  $\text{ZnCl}_2$ , (c) 0.05g  $\text{MgCl}_2 \cdot 6\text{H}_2\text{O}$  and (d) 0.1g  $\text{MgCl}_2 \cdot 6\text{H}_2\text{O}$ .

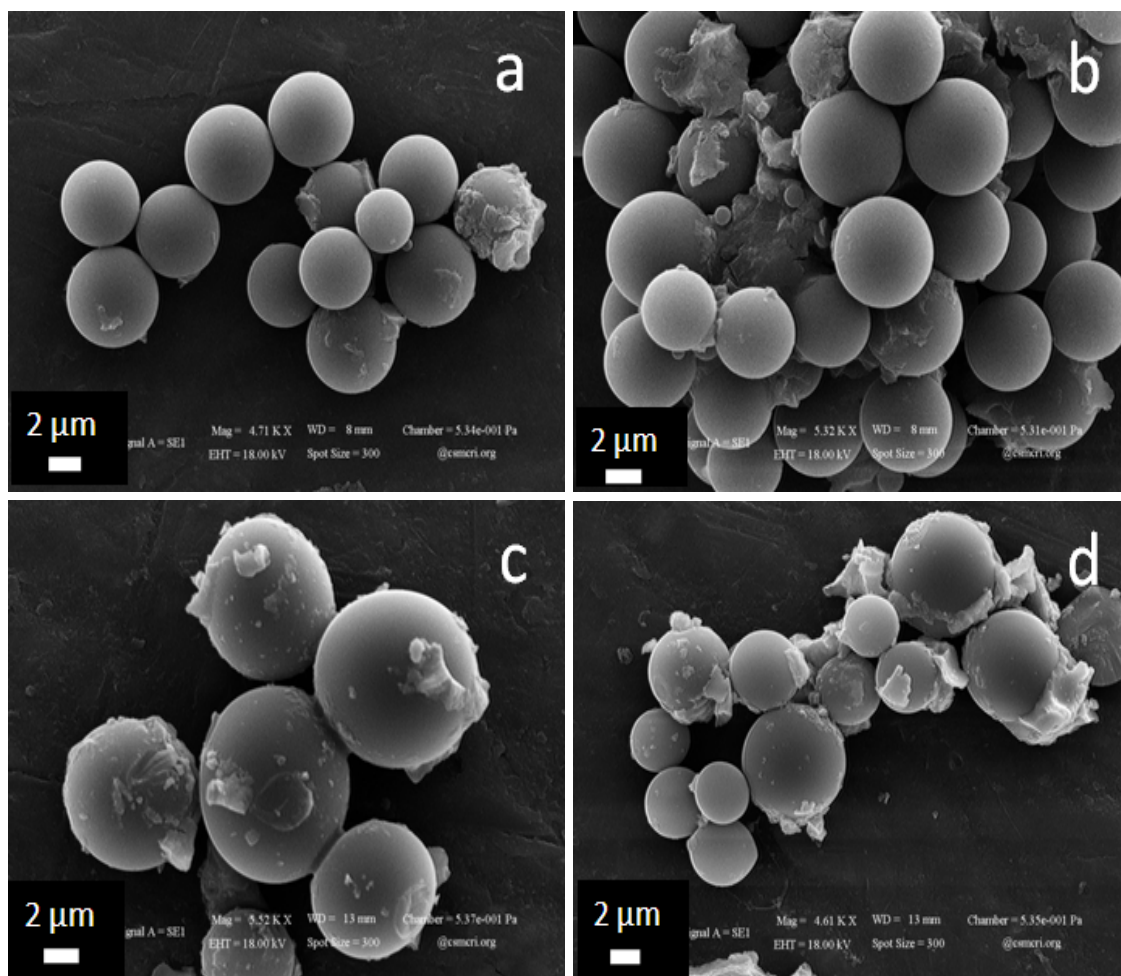

**Fig. S9** SEM images of carbon spheres coated with zinc hydroxide and magnesium hydroxide prepared by (a) 0.15g ZnCl<sub>2</sub> (b) 0.2g ZnCl<sub>2</sub>, (c) 0.15g MgCl<sub>2</sub>·6H<sub>2</sub>O and (d) 0.2g MgCl<sub>2</sub>·6H<sub>2</sub>O.

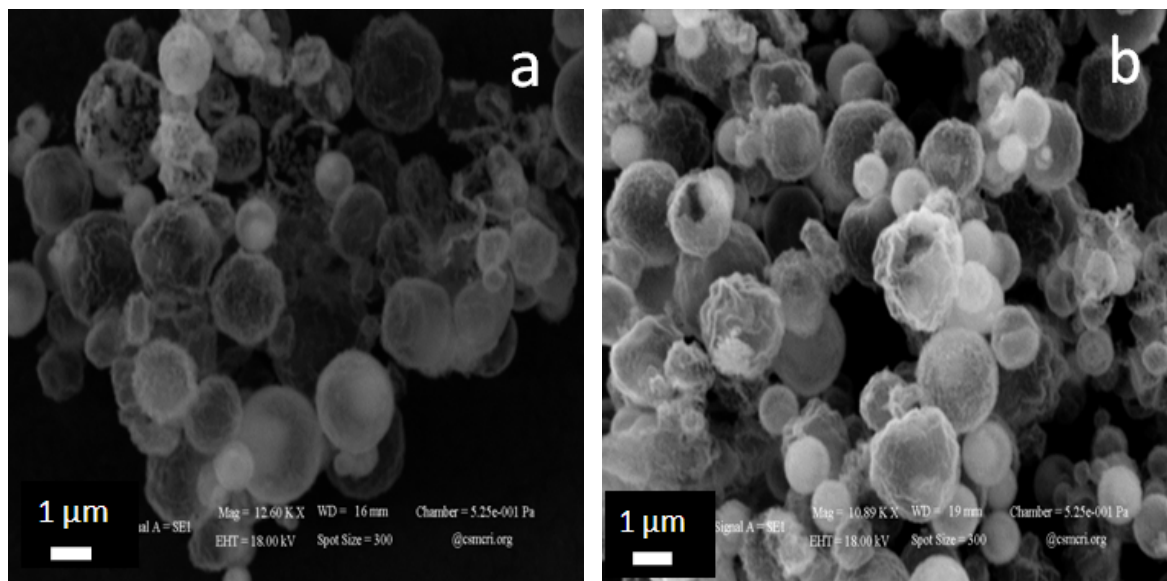

**Fig. S10** SEM images of (a) ZnO and (b) MgO hollow sphere obtained by calcinations of carbon metal hydroxide core shell structure (0.1g of metal salt concentration) at 600 °C for 2 hr.

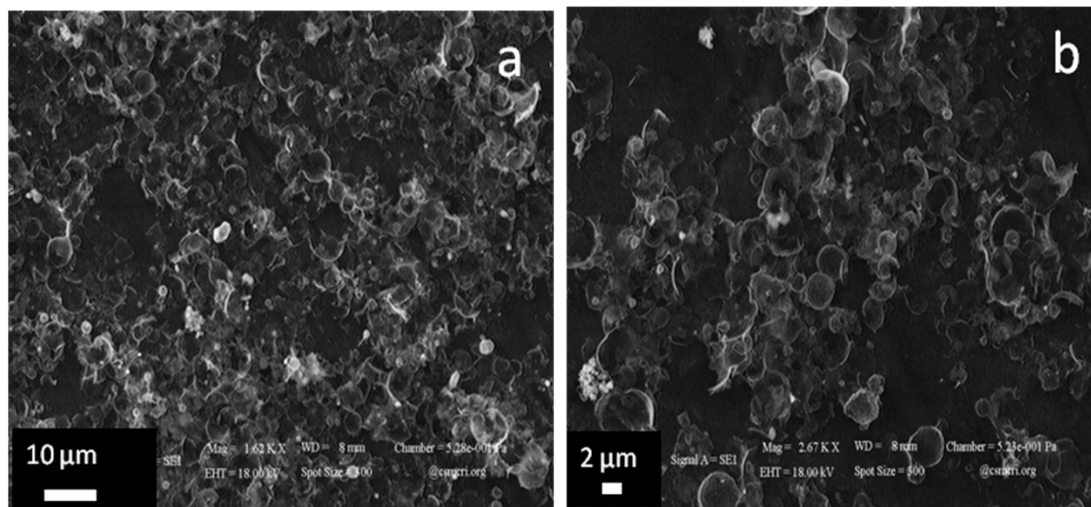

**Fig. S11** SEM images of (a) ZnO and (b) MgO break hollow spheres obtained after calcinations of carbon metal hydroxide core shell structure (0.1g of metal salt concentration) at 700 °C for 2 hr.

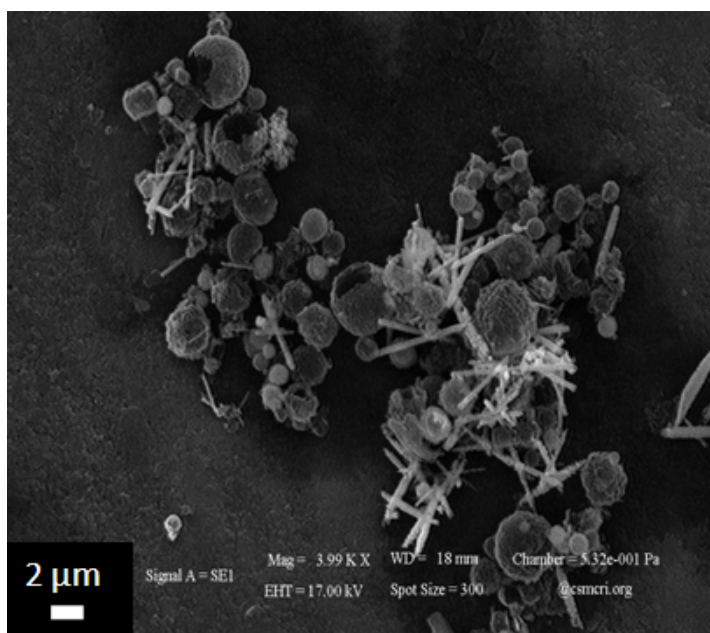

**Fig. S12** SEM images of ZnO solid rods and hollow spheres produced using ammonium hydroxide as precipitating agent.
